# Supplementary material for: A rhodamine–naphthalimide–benzamide trichromophoric system with solid-state and multiple solvent dependent aggregate emissive properties
Source: Royal Society of Chemistry journal article supplement (doi:10.1039/d1qm00397f), 2021-01-01
Supplement: d1qm00397f1.pdf [file d1qm00397f1.pdf]

## **A rhodamine-naphthalimide-benzamide trichromophoric system demonstrated a unique solvent depended aggregates and its emission**

Hemant Sharma,<sup>a</sup> Kyle N. Hearn,<sup>a,b</sup> Anna Maria Ranieri,<sup>c</sup> Chiara Caporale,<sup>c</sup> Massimiliano  
Massi<sup>c</sup> and Frederick M. Pfeffer<sup>\*a</sup>

<sup>a</sup>School of Life and Environmental Sciences, Deakin University, Waurn Ponds, VIC 3216, Australia.

<sup>b</sup>College of Science, Engineering & Health, RMIT, La Trobe Street, Melbourne, VIC, 3000, Australia.

<sup>c</sup>School of Molecular and Life Sciences, Curtin University, Kent Street, Bentley, WA, 6102, Australia

E-mail: fred.pfeffer@deakin.edu.au

### Contents:

|                                                                       |   |
|-----------------------------------------------------------------------|---|
| <b>S1</b> Solvatochromic behaviour of conjugate <b>3</b>              | 2 |
| <b>S2</b> Spectra of new compounds                                    | 3 |
| <b>S3</b> UV-vis and Fluorescence spectroscopy experiments            | 7 |
| <b>S4.</b> DLS spectra                                                | 8 |
| <b>S5.</b> Change in fluorescence intensity before and after grinding | 9 |

## S1. Solvatochromic behaviour of conjugate **3**

**Table S1. Change in the emission maxima of **3** with solvent**

| Solvent           | Dielectric Constant $\epsilon^a$ | Emission peak (nm) |
|-------------------|----------------------------------|--------------------|
| CHCl <sub>3</sub> | 4.8                              | 447                |
| THF               | 7.6                              | 450                |
| EtOH              | 24.6                             | 463                |
| ACN               | 37.5                             | 454                |
| DMSO              | 46.7                             | 457 & 582          |
| DMF               | 36.7                             | 457 & 577          |

<sup>a</sup>Values from *Vogel's Textbook of Practical Organic Chemistry (5<sup>th</sup> Edition)*. London: Longman Scientific & Technical, **1989**

## S2 Spectra of compounds

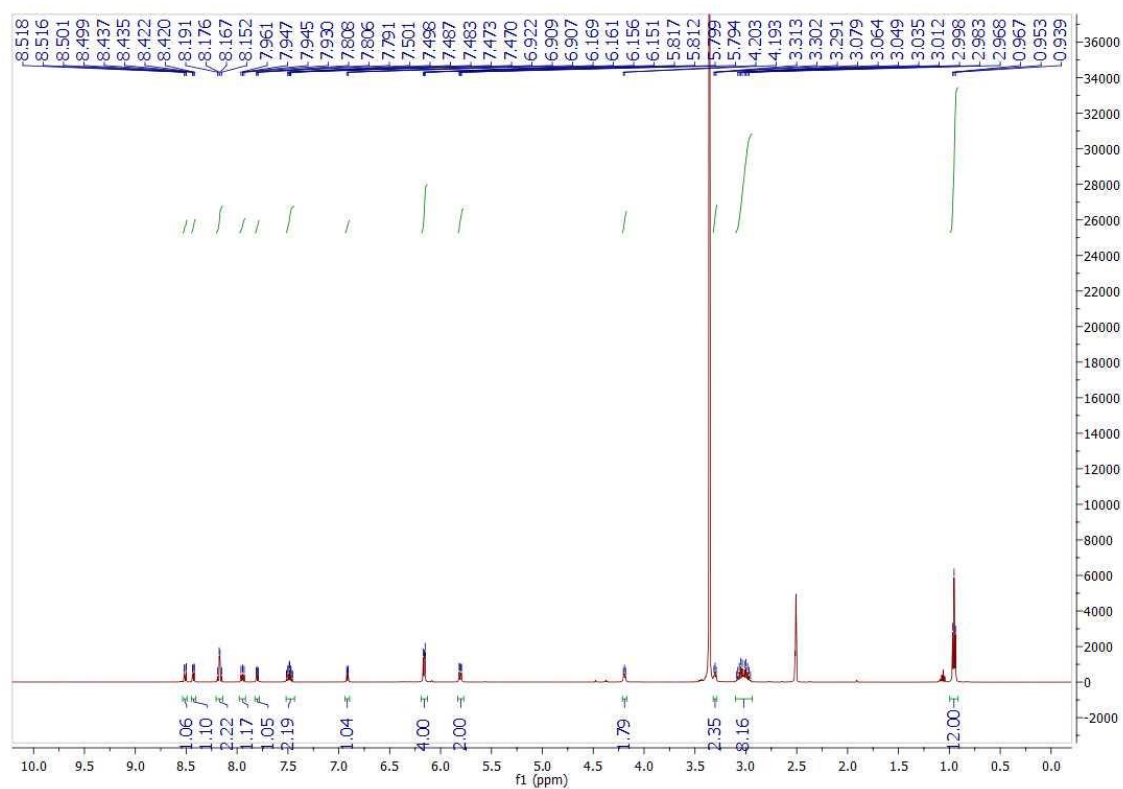

**Figure S1.**  $^1\text{H}$  NMR of **2** in  $\text{DMSO-}d_6$ .

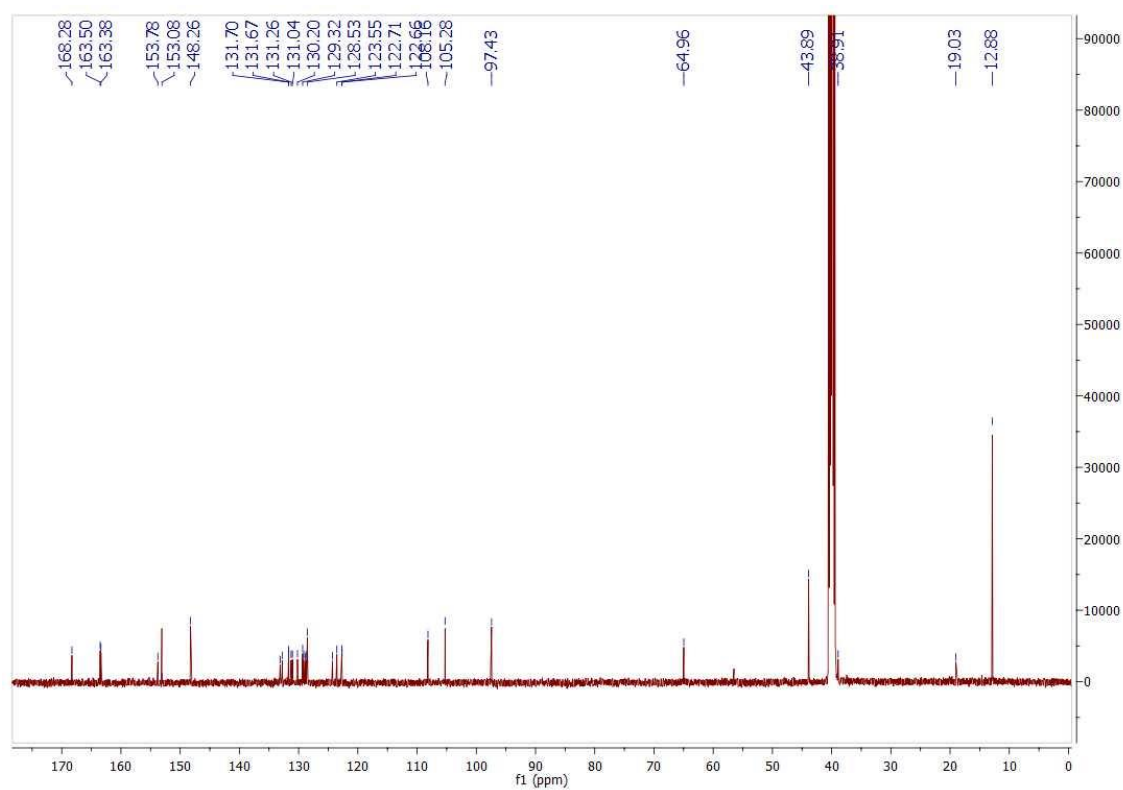

**Figure S2.**  $^{13}\text{C}$  NMR of **2** in  $\text{DMSO-}d_6$ .

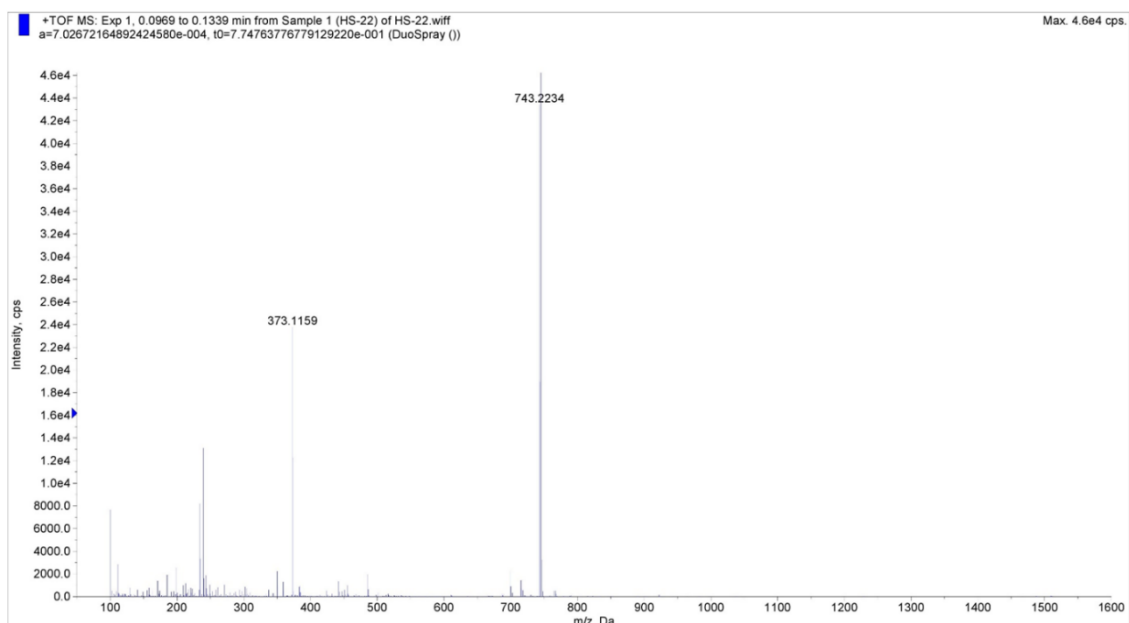

**Figure S3.** High Resolution Mass Spectrum of **2**.

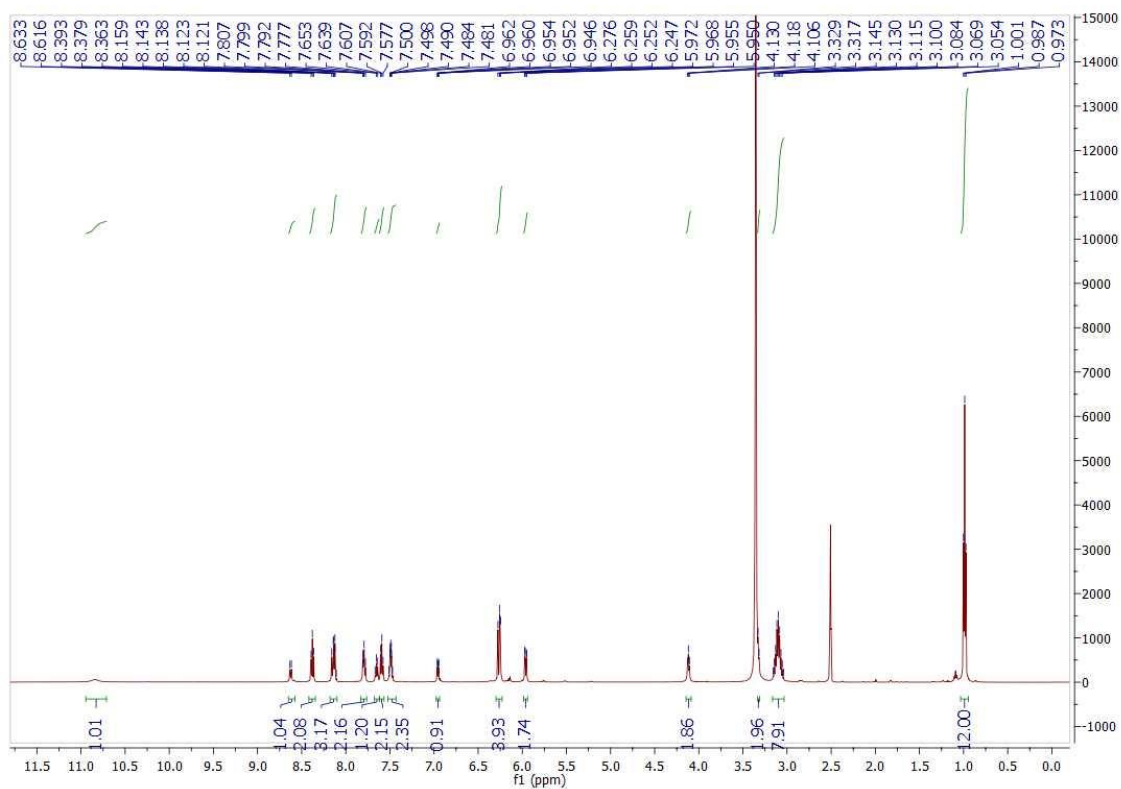

**Figure S4.**  $^1\text{H}$  NMR of **3** in  $\text{DMSO-}d_6$ .

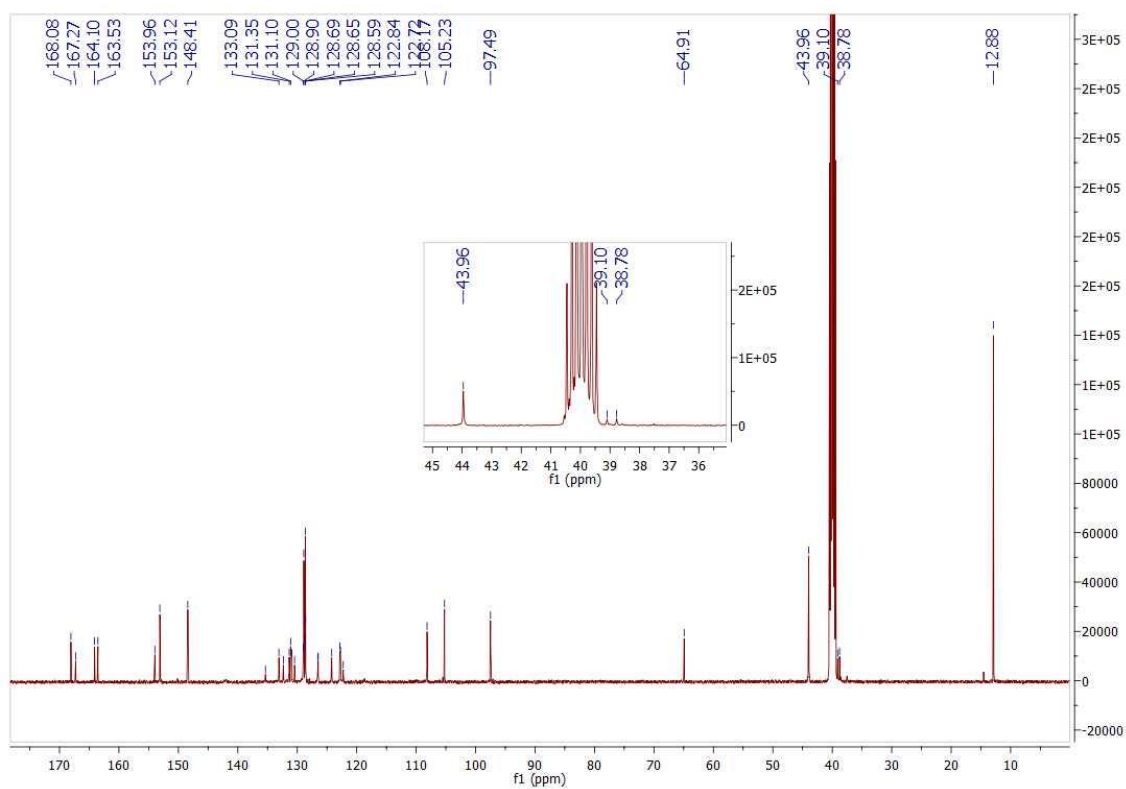

**Figure S5.** <sup>13</sup>C NMR of **3** in DMSO- *d*<sub>6</sub>.

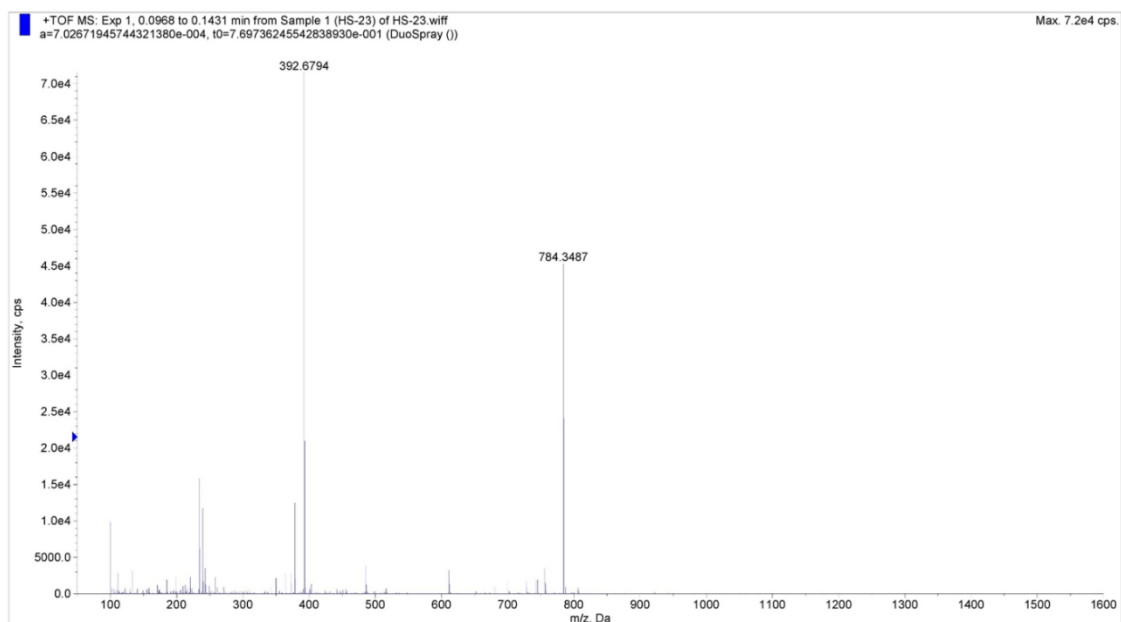

**Figure S6.** High Resolution Mass Spectrum of **3**.

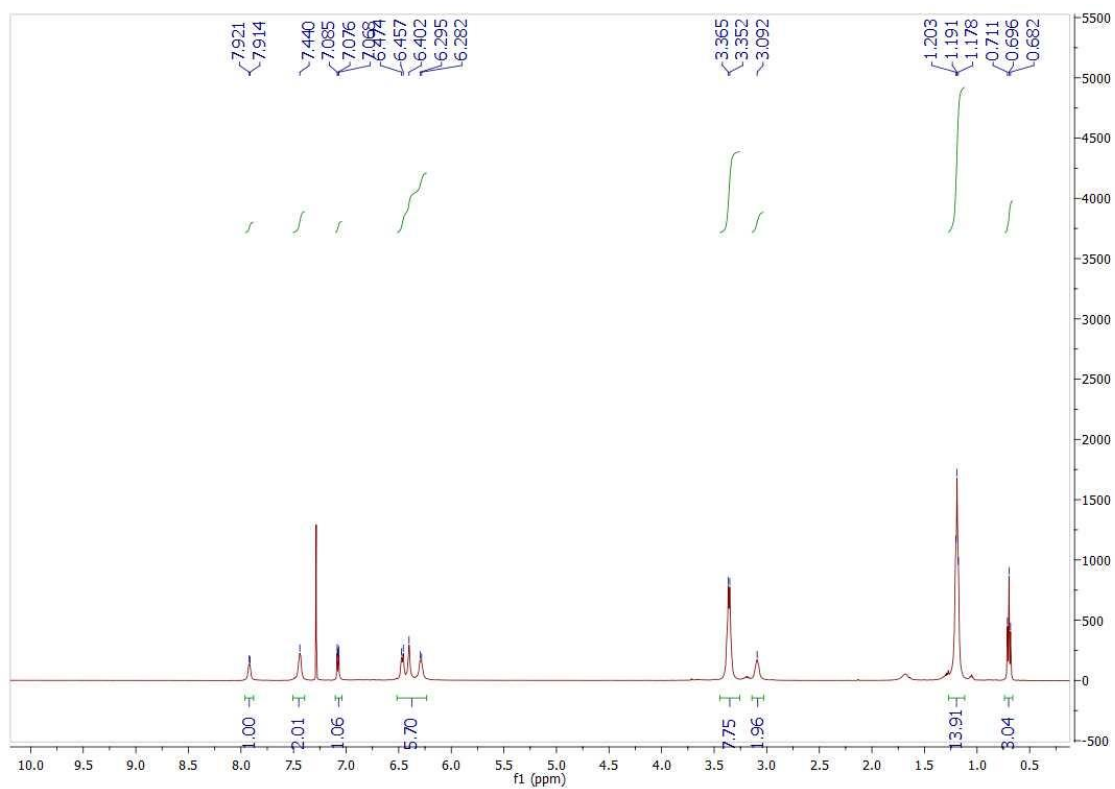

**Figure S7.** <sup>1</sup>H NMR of **6** in CDCl<sub>3</sub>.

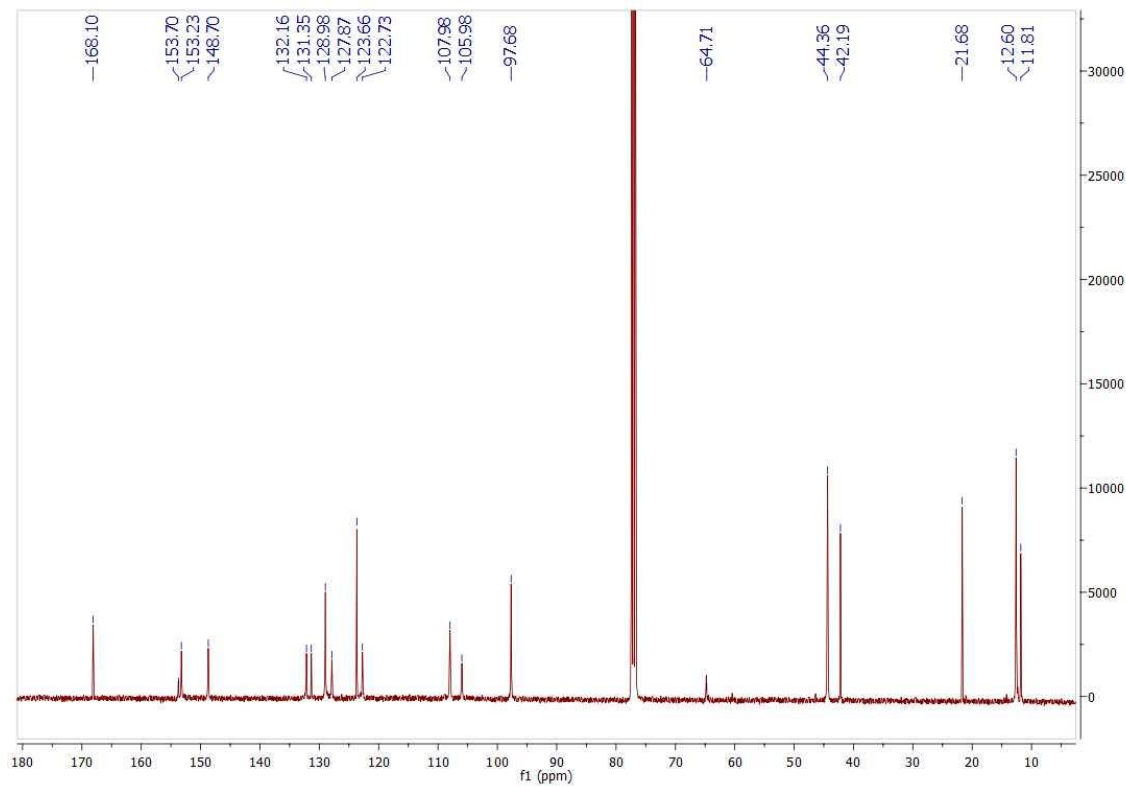

**Figure S8.** <sup>13</sup>C NMR of **6** in CDCl<sub>3</sub>.

### S3. UV-vis and Fluorescence Spectroscopy Experiments

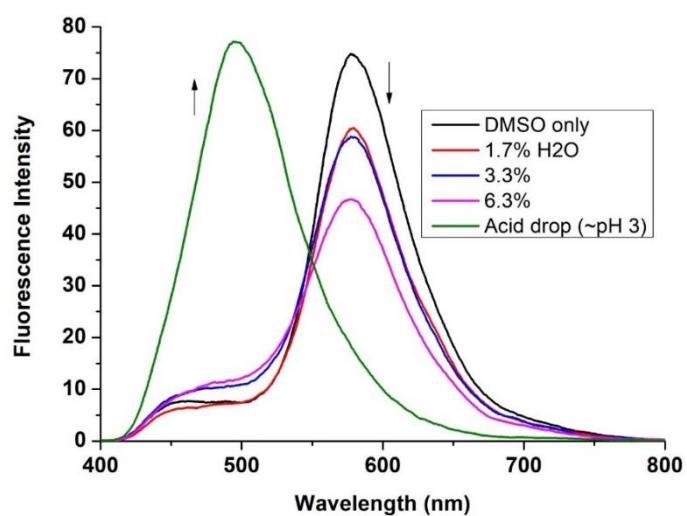

**Figure S9.** Emission spectra of **3** (100  $\mu\text{M}$ ;  $\lambda_{\text{ex}}$  367 nm) in DMSO with increasing water content.

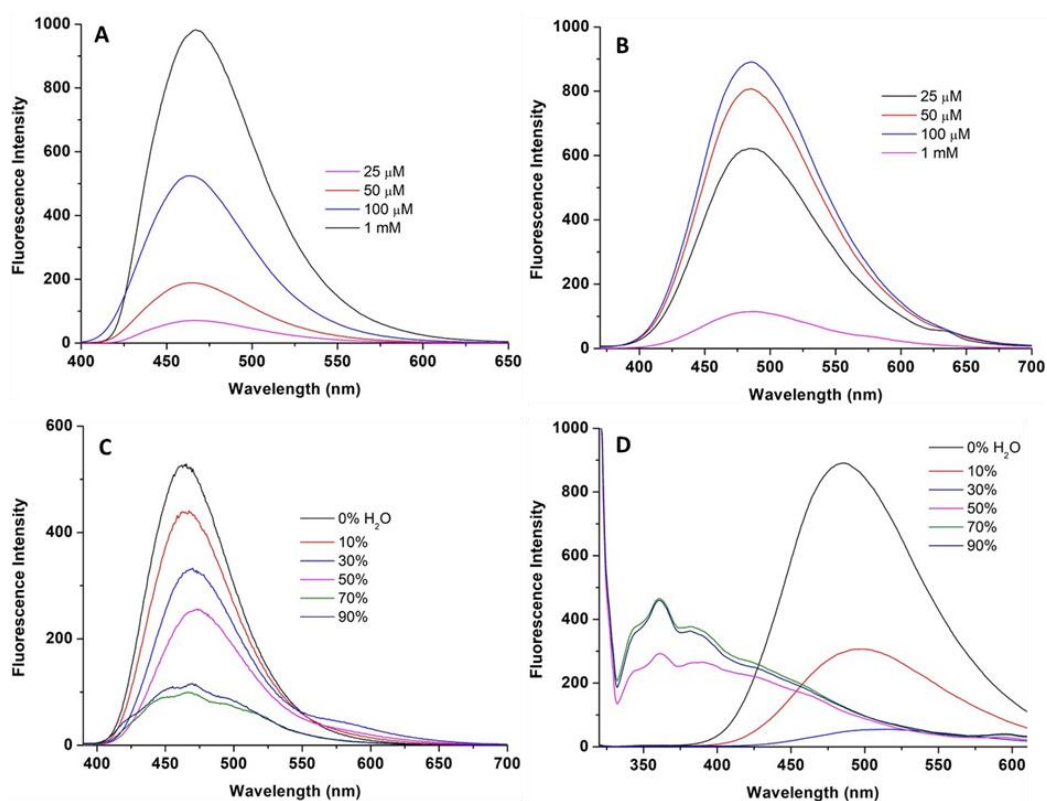

**Figure S10:** (A) and (B) Effect of concentration on the emission spectra of **5** ( $\lambda_{\text{ex}}$  367 nm) and **6** ( $\lambda_{\text{ex}}$  317 nm) in DMSO respectively; (C) and (D) Effect of water content on the emission spectra of **5** (100  $\mu\text{M}$ ;  $\lambda_{\text{ex}}$  367 nm) and **6** (100  $\mu\text{M}$ ;  $\lambda_{\text{ex}}$  317 nm) in DMSO with increasing water content respectively.

#### S4. DLS spectra

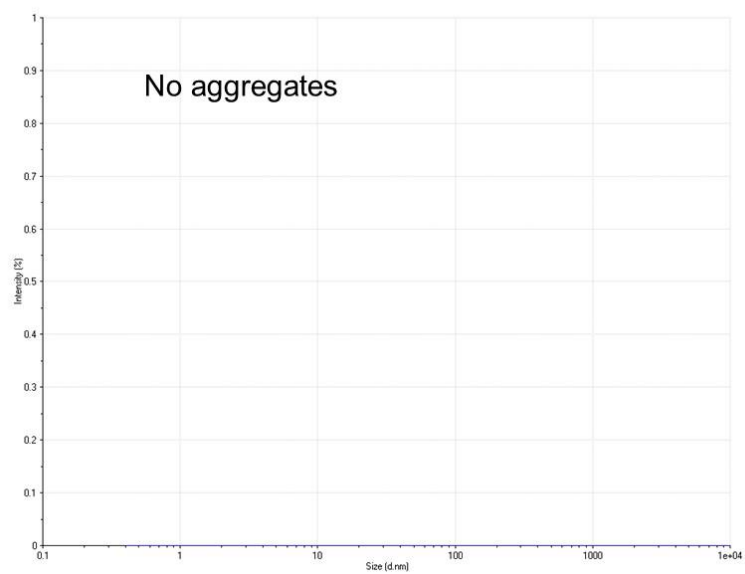

**Figure S11:** DLS spectra of **3** at pH 11.0 in 7:3 DMSO:H<sub>2</sub>O (v/v)

### S5. Change in fluorescence intensity before and after grinding

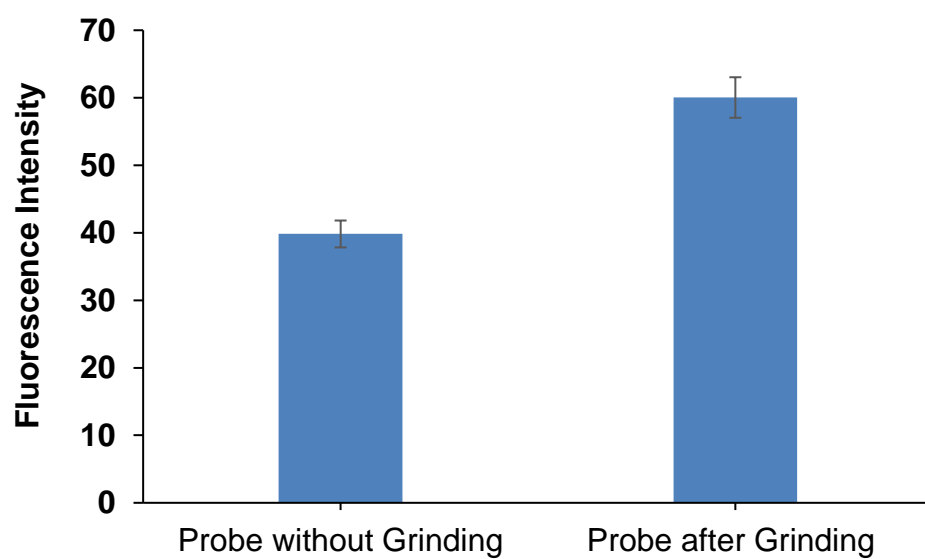

**Figure S12.** Change in fluorescence of conjugate **3** before and after grinding. The intensity was obtained from ImageJ software.
